# Supplementary material for: Life cycle impact assessment and life cycle cost assessment for centralized and decentralized wastewater treatment plants in Thailand
Source: PubMed Central journal article supplement (PMC9411131; doi:10.1038/s41598-022-18852-y), 2022-08-25
Supplement: 41598_2022_18852_MOESM1_ESM.pdf [file 41598_2022_18852_MOESM1_ESM.pdf]

## Supplementary Information

### Life cycle impact assessment and life cycle cost assessment for centralized and decentralized wastewater treatment plants in Thailand

Rutjaya Prateep Na Talang

*Address: Department of Environmental Engineering, Faculty of Engineering, Kasetsart University, Bangkok 10900, Thailand*

Phone: +662 7970999

Fax: +662 5790730

Email: rutjaya@gmail.com

Sanya Sirivithayapakorn

*Address: Department of Environmental Engineering, Faculty of Engineering, Kasetsart University, Bangkok 10900, Thailand*

Phone: +662 7970999

Fax: +662 5790730

Email: fengsys@ku.ac.th

Sucheela Polruang\*

Address: Department of Environmental Engineering, Faculty of Engineering, Kasetsart University, Bangkok 10900, Thailand

Phone: +662 7970999

Fax: +662 5790730

Email: fengslpo@ku.ac.th

\*corresponding author

**Table SI-1** Life cycle inventory data of centralized and decentralized WWTPs

| Data                     | Unit           | Centralized WWTP        |                       | Decentralized WWTP    |                       |
|--------------------------|----------------|-------------------------|-----------------------|-----------------------|-----------------------|
|                          |                | Average                 | Standard deviation    | Average               | Standard deviation    |
| <b><u>Input</u></b>      |                |                         |                       |                       |                       |
| Electricity              | kWh            | 0.873                   | 0.321                 | 0.363                 | 0.161                 |
| Transport polymer        | tkm            | 1.85x10 <sup>-6</sup> * |                       | 1.73x10 <sup>-6</sup> | 8.57x10 <sup>-9</sup> |
| Polymer                  | kg             | 9.24x10 <sup>-5</sup>   | 8.96x10 <sup>-5</sup> | 0.00009*              |                       |
| Water supply             | m <sup>3</sup> | 0.00625                 | 0.00630               | 0.00544               | 0.00002               |
| <b><u>Output</u></b>     |                |                         |                       |                       |                       |
| Wastewater               | m <sup>3</sup> | 1.000                   |                       | 1.000                 |                       |
| Sludge                   | kg             | 0.0927                  | 0.1018                | 0.0881                | 0.0008                |
| <i>Emission to air</i>   |                |                         |                       |                       |                       |
| Carbon dioxide           | kg             | 0.01896                 | 0.00487               | 0.03662               | 0.01404               |
| Methane                  | kg             | 0.00041                 | 0.00052               | 0.00114               | 0.00134               |
| Dinitrogen oxide         | kg             | 0.00008                 | 0.00005               | 0.00007*              |                       |
| <i>Emission to water</i> |                |                         |                       |                       |                       |
| BOD5                     | kg             | 0.00484                 | 0.00157               | 0.00816               | 0.00248               |
| COD                      | kg             | 0.02352                 | 0.00730               |                       |                       |
| Suspended solids         | kg             | 0.00695                 | 0.00272               | 0.01136               | 0.00428               |
| Phosphorus, total        | kg             | 0.00073                 | 0.00035               | 0.00152*              |                       |
| Nitrogen, total          | kg             | 0.00589                 | 0.00207               |                       |                       |
| Nitrogen, TKN            | kg             |                         |                       | 0.00586               | 0.00001               |

**Note:** \* calculated amount from secondary data.

**Table S-2** The midpoint impact categories of the Stepwise2006

| Midpoint impact category          | Unit                                   | Category indicator                                                                                                                                                                                                                                                                                    | Characterization model source                                                                                                                          |
|-----------------------------------|----------------------------------------|-------------------------------------------------------------------------------------------------------------------------------------------------------------------------------------------------------------------------------------------------------------------------------------------------------|--------------------------------------------------------------------------------------------------------------------------------------------------------|
| Human toxicity (carcinogens),     | kg C <sub>2</sub> H <sub>3</sub> Cl-eq | kg-equivalents of chloroethylene emitted into air                                                                                                                                                                                                                                                     | IMPACT2002+                                                                                                                                            |
| Human toxicity (non- carcinogens) | kg C <sub>2</sub> H <sub>3</sub> Cl-eq | kg-equivalents of chloroethylene emitted into air                                                                                                                                                                                                                                                     | Added factors for 'aluminium, ion' emissions                                                                                                           |
| Aquatic ecotoxicity,              | kg-eq. TEG water                       | kg-equivalents triethylene glycol into water                                                                                                                                                                                                                                                          | IMPACT2002+                                                                                                                                            |
| Terrestrial ecotoxicity           | kg-eq. TEG soil                        | kg-equivalents triethylene glycol into soil                                                                                                                                                                                                                                                           | IMPACT2002+, To avoid double-counting with the nature occupation, the more localized impacts of emissions to soil are excluded in the Stepwise method. |
| Global warming                    | kg CO <sub>2</sub> -eq                 | 100 years time horizon                                                                                                                                                                                                                                                                                | IPPC 2001 (also used in EDIP2003)                                                                                                                      |
| Respiratory inorganics            | kg PM <sub>2.5</sub> -eq               | kg-equivalents of PM <sub>2.5</sub> into air                                                                                                                                                                                                                                                          | IMPACT2002+                                                                                                                                            |
| Respiratory organics              | pers*ppm*h                             | person*ppm*hours (i.e., the product of the number of people exposed above the 60 ppb threshold, the annual duration of the exposure above the threshold, and the accumulated hourly mean ozone concentration over the threshold)                                                                      | EDIP2003                                                                                                                                               |
| Photochemical ozone               | m <sup>2</sup> *ppm*hours              | m <sup>2</sup> *ppm*hours (i.e., the product of the area of vegetation exposed to the 40 ppb threshold of chronic effects, the annual duration of exposure over the threshold, and the accumulated hourly mean ozone concentration over the threshold during daylight hours in the vegetation period) | EDIP2003                                                                                                                                               |
| Acidification                     | m <sup>2</sup> UES                     | m <sup>2</sup> unprotected ecosystem                                                                                                                                                                                                                                                                  | EDIP2003                                                                                                                                               |
| Aquatic eutrophication            | kg NO <sub>3</sub> -eq                 | kg nitrate equivalents                                                                                                                                                                                                                                                                                | New; developed for this method                                                                                                                         |
| Terrestrial eutrophication        | m <sup>2</sup> UES                     | m <sup>2</sup> unprotected ecosystem (i.e. the ecosystem area that is brought to exceed the critical load for terrestrial eutrophication)                                                                                                                                                             | EDIP2003                                                                                                                                               |
| Nature occupation                 | m <sup>2</sup> -years agr              | m <sup>2</sup> -equivalents arable land (representing the impact on biodiversity from the occupation of one m <sup>2</sup> of arable land during one year)                                                                                                                                            | modified from IMPACT2002+                                                                                                                              |
| Non-renewable energy              | MJ primary                             | MJ total primary non-renewable energy                                                                                                                                                                                                                                                                 | IMPACT2002+                                                                                                                                            |
| Mineral extraction                | MJ extra                               | MJ additional energy (the difference between the current energy requirement for extraction and an estimated future energy requirement for extraction from lower grade ores)                                                                                                                           | IMPACT2002+                                                                                                                                            |

Source: Weidema B P, et al. <sup>1</sup>

**Table S-3** The monetary weighting factors in the Stepwise2006 method

|          | <b>Impact category</b>           | <b>Unit</b>                            | <b>Monetary weighting factors<br/>(Euro<sub>2003</sub>/unit)</b> |
|----------|----------------------------------|----------------------------------------|------------------------------------------------------------------|
| Endpoint | Human well-being                 | QALY                                   | 74,000                                                           |
|          | Ecosystem                        | specie                                 | 30,800,000,000                                                   |
|          | Ecosystem                        | BAHY                                   | 1,400                                                            |
| Midpoint | Human toxicity (carcinogens),    | kg C <sub>2</sub> H <sub>3</sub> Cl-eq | 0.27                                                             |
|          | Human toxicity (non-carcinogens) | kg C <sub>2</sub> H <sub>3</sub> Cl-eq | 0.27                                                             |
|          | Aquatic ecotoxicity,             | kg-eq. TEG water                       | 0.0000071                                                        |
|          | Terrestrial ecotoxicity          | kg-eq. TEG soil                        | 0.0011                                                           |
|          | Global warming                   | kg CO <sub>2</sub> -eq                 | 0.083                                                            |
|          | Respiratory inorganics           | kg PM <sub>2.5</sub> -eq               | 68                                                               |
|          | Respiratory organics             | pers*ppm*h                             | 0.26                                                             |
|          | Photochemical ozone              | m <sup>2</sup> *ppm*hours              | 0.00037                                                          |
|          | Acidification                    | m <sup>2</sup> UES                     | 0.0077                                                           |
|          | Aquatic eutrophication           | kg NO <sub>3</sub> -eq                 | 0.10                                                             |
|          | Terrestrial eutrophication       | m <sup>2</sup> UES                     | 0.013                                                            |
|          | Nature occupation                | m <sup>2</sup> -years agr              | 0.12                                                             |
|          | Non-renewable energy             | MJ primary                             | -                                                                |
|          | Mineral extraction               | MJ extra                               | 0.004                                                            |

**Source:** Weidema B P <sup>2</sup>Pizzol, et al. <sup>3</sup>

**Note:** Quality Adjusted Life Year (QALY); Biodiversity Adjusted Hectare Year (BAHY)

### Currency conversation equations

In environmental cost analysis, the weighting results in the 2003 European currency (EUR<sub>2003</sub>) were converted into the 2003 Thai currency (THB<sub>2003</sub>) based on purchasing power parity (PPP)<sup>4</sup>, as expressed in Equation (1)<sup>5</sup>. The conversion of year-value from 2003 to 2020 using gross domestic product (GDP) deflator index<sup>4</sup> was calculated by equation (2)<sup>5</sup>. The conversion factors are tabulated in Table SI-4.

$$THB_{2003} = \frac{EUR_{2003} \times PPP_{THB2003}}{PPP_{EUR2003}}, \quad (1)$$

where THB<sub>2003</sub> and EUR<sub>2003</sub> are the 2003 Thai baht (THB) and Euro (EUR) values, and PPP<sub>THB2003</sub> and PPP<sub>EUR2003</sub> are the exchange rate-adjusted purchasing power parity for Thai baht (THB) and Euro (EUR).

$$THB_{2020} = \frac{THB_{2003} \times D_{2020}}{D_{2003}} \quad (2)$$

where THB<sub>2003</sub> and THB<sub>2020</sub> are the 2003 and 2020 Thai baht (THB) values, and D<sub>2003</sub> and D<sub>2020</sub> are the 2003 and 2020 GDP deflator indexes.

**Table SI-4** The conversion factors for LCCA

| List                    | Conversion factor | Reference               |
|-------------------------|-------------------|-------------------------|
| PPP <sub>Thai2003</sub> | 11.04             | World Bank <sup>4</sup> |
| PPP <sub>EUR2003</sub>  | 0.84              | OECD <sup>6</sup>       |
| GDP <sub>Thai2003</sub> | 102.15            | World Bank <sup>4</sup> |
| GDP <sub>Thai2020</sub> | 158.35            | World Bank <sup>4</sup> |

**Table SI-5** Annual cash flow and the net present value (NPV) of option I where the 10-year period corresponds to the years 2022 – 2031 in million Thai baht<sub>2020</sub>.

| Year          | Revenues       |                    | Expenditures |                     | Period | Cash flow |
|---------------|----------------|--------------------|--------------|---------------------|--------|-----------|
|               | Treated WW fee | Sale of fertilizer | O&M costs    | Environmental costs |        |           |
| 2022          | 669.85         | 119.08             | -968.29      | -656.91             | 0      | -836.27   |
| 2023          | 669.85         | 119.08             | -968.29      | -657.23             | 1      | -836.59   |
| 2024          | 669.85         | 119.08             | -968.29      | -657.47             | 2      | -836.80   |
| 2025          | 751.02         | 133.55             | -1079.70     | -719.16             | 3      | -914.29   |
| 2026          | 751.02         | 133.55             | -1079.70     | -719.28             | 4      | -914.41   |
| 2027          | 832.20         | 148.02             | -1191.12     | -781.02             | 5      | -991.92   |
| 2028          | 832.20         | 148.02             | -1191.12     | -781.00             | 6      | -991.86   |
| 2029          | 913.38         | 162.48             | -1302.54     | -842.52             | 7      | -1069.20  |
| 2030          | 913.38         | 162.48             | -1302.54     | -842.29             | 8      | -1068.98  |
| 2031          | 985.88         | 176.95             | -1413.96     | -897.12             | 9      | -1148.24  |
| Discount Rate |                |                    | 10%          |                     | NPV    | -6309.96  |

**Table SI-6** Annual cash flow and the net present value (NPV) of option II where the 10-year period corresponds to the years 2022 – 2031 in million Thai baht<sub>2020</sub>.

| Year          | Revenues       |                    | Expenditures |                     | Period | Cash flow |
|---------------|----------------|--------------------|--------------|---------------------|--------|-----------|
|               | Treated WW fee | Sale of fertilizer | O&M costs    | Environmental costs |        |           |
| 2022          | 669.85         | 119.08             | -968.29      | -656.91             | 0      | -836.27   |
| 2023          | 669.85         | 119.08             | -968.29      | -657.23             | 1      | -836.59   |
| 2024          | 669.85         | 119.08             | -968.29      | -657.45             | 2      | -836.80   |
| 2025          | 763.19         | 135.46             | -1137.14     | -722.59             | 3      | -961.07   |
| 2026          | 775.36         | 137.38             | -1194.57     | -726.13             | 4      | -1007.97  |
| 2027          | 868.70         | 153.76             | -1363.42     | -791.30             | 5      | -1132.26  |
| 2028          | 880.87         | 155.68             | -1420.86     | -794.66             | 6      | -1178.97  |
| 2029          | 974.21         | 172.06             | -1589.71     | -859.65             | 7      | -1303.09  |
| 2030          | 986.38         | 173.98             | -1647.14     | -862.85             | 8      | -1349.64  |
| 2031          | 985.88         | 173.98             | -1647.14     | -862.41             | 9      | -1349.69  |
| Discount Rate |                |                    | 10%          |                     | NPV    | -6938.15  |

**Table SI-7** Annual cash flow and the net present value (NPV) of option III where the 10-year period corresponds to the years 2022 – 2031 in million Thai baht<sub>2020</sub>.

| Year          | Revenues       |                    | Expenditures |                     | Period | Cash flow |
|---------------|----------------|--------------------|--------------|---------------------|--------|-----------|
|               | Treated WW fee | Sale of fertilizer | O&M costs    | Environmental costs |        |           |
| 2022          | 669.85         | 119.08             | -968.29      | -656.91             | 0      | -836.27   |
| 2023          | 669.85         | 119.08             | -968.29      | -657.23             | 1      | -836.59   |
| 2024          | 669.85         | 119.08             | -968.29      | -657.45             | 2      | -836.80   |
| 2025          | 763.19         | 135.46             | -1137.14     | -722.59             | 3      | -961.07   |
| 2026          | 775.36         | 137.38             | -1194.57     | -726.13             | 4      | -1007.97  |
| 2027          | 868.70         | 153.76             | -1363.42     | -791.30             | 5      | -1132.26  |
| 2028          | 880.87         | 155.68             | -1420.86     | -794.66             | 6      | -1178.97  |
| 2029          | 917.37         | 161.42             | -1593.16     | -804.79             | 7      | -1319.16  |
| 2030          | 953.87         | 167.17             | -1765.46     | -814.84             | 8      | -1459.26  |
| 2031          | 985.88         | 172.34             | -1920.53     | -823.56             | 9      | -1585.86  |
| Discount Rate |                |                    | 10%          |                     | NPV    | -7097.69  |



**Table SI-8** Annual cash flow and the net present value (NPV) of option IV where the 10-year period corresponds to the years 2022 – 2031 in million Thai baht<sub>2020</sub>.

| Year          | Revenues       |                    | Expenditures |                     | Period | Cash flow |
|---------------|----------------|--------------------|--------------|---------------------|--------|-----------|
|               | Treated WW fee | Sale of fertilizer | O&M costs    | Environmental costs |        |           |
| 2022          | 669.85         | 119.08             | -968.29      | -656.91             | 0      | -836.27   |
| 2023          | 669.85         | 119.08             | -968.29      | -657.23             | 1      | -836.59   |
| 2024          | 669.85         | 119.08             | -968.29      | -657.45             | 2      | -836.80   |
| 2025          | 763.19         | 135.46             | -1137.14     | -722.59             | 3      | -961.07   |
| 2026          | 799.69         | 141.21             | -1309.44     | -732.98             | 4      | -1101.52  |
| 2027          | 836.19         | 146.96             | -1481.74     | -743.29             | 5      | -1241.88  |
| 2028          | 872.69         | 152.70             | -1654.04     | -753.50             | 6      | -1382.15  |
| 2029          | 909.19         | 158.45             | -1826.34     | -763.63             | 7      | -1522.34  |
| 2030          | 945.69         | 164.19             | -1998.64     | -773.68             | 8      | -1662.44  |
| 2031          | 985.88         | 170.71             | -2193.92     | -784.70             | 9      | -1822.03  |
| Discount Rate |                |                    | 10%          |                     | NPV    | -7643.56  |

## References

- 1 Weidema B P, Wesnæs M, Hermansen J, Kristensen T & Halberg N. in *Environmental improvement potentials of meat and dairy products* (eds Eder P & Delgado L) (Institute for Prospective Technological Studies, Joint Research Centre, Sevilla, Spain, 2008).
- 2 Weidema B P. in *Environmental improvement potentials of meat and dairy products* (eds Eder P & Delgado L) (Institute for Prospective Technological Studies, Sevilla, Spain, 2008).
- 3 Pizzol, M., Weidema, B., Brandão, M. & Osset, P. Monetary valuation in Life Cycle Assessment: a review. *J. Clean. Prod.* **86**, 170-179, doi:10.1016/j.jclepro.2014.08.007 (2015).
- 4 World Bank. *World Databank*, <data.worldbank.org> (2020).
- 5 Brander, L. (Ecosystem Services Economics Unit, UNEP-DEPI, Nairobi, Kenya, 2013).
- 6 OECD. *Purchasing power parities (PPP)*, <[www.oecd.org](http://www.oecd.org)> (2018).
